# Supplementary material for: Phenothiazinium Photosensitizers Associated with Silver Nanoparticles in Enhancement of Antimicrobial Photodynamic Therapy
Source: MDPI journal article supplement (doi:10.3390/antibiotics10050569), 2021-05-12
Supplement: s1 [file s1]

Supplementary Material

Dark

Light (15 J cm<sup>-2</sup>)

Control

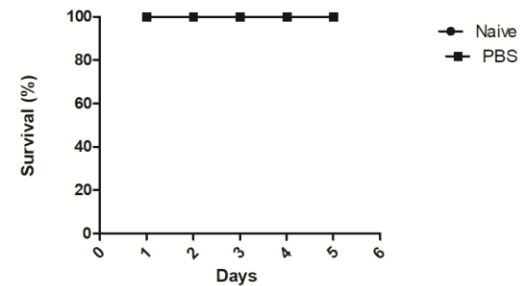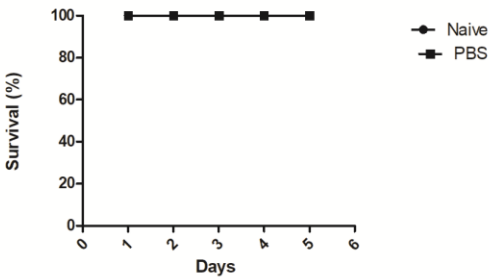

AgNO<sub>3</sub>

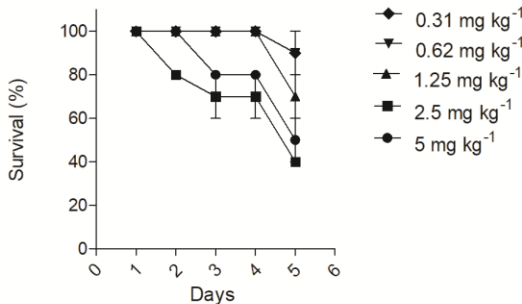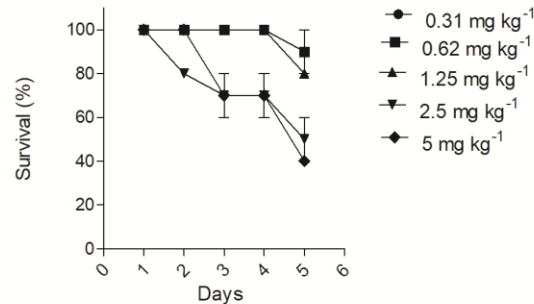

AgNPs

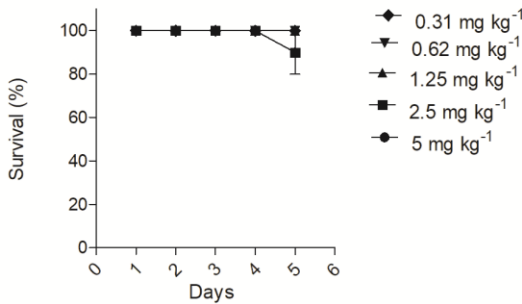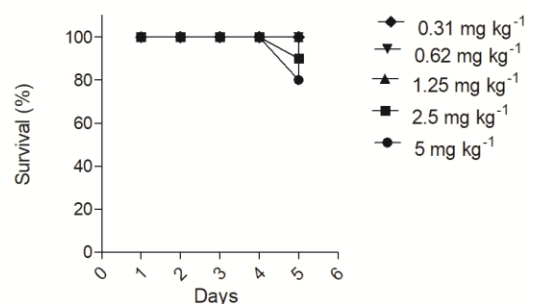

MB

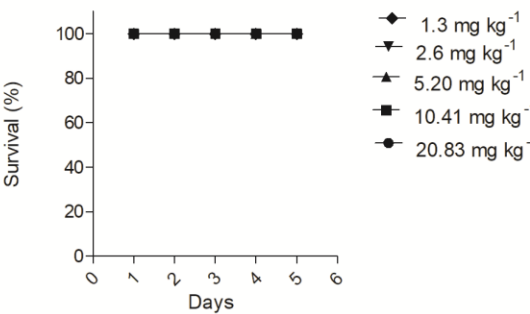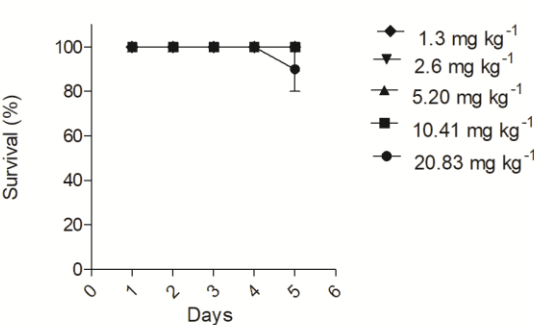

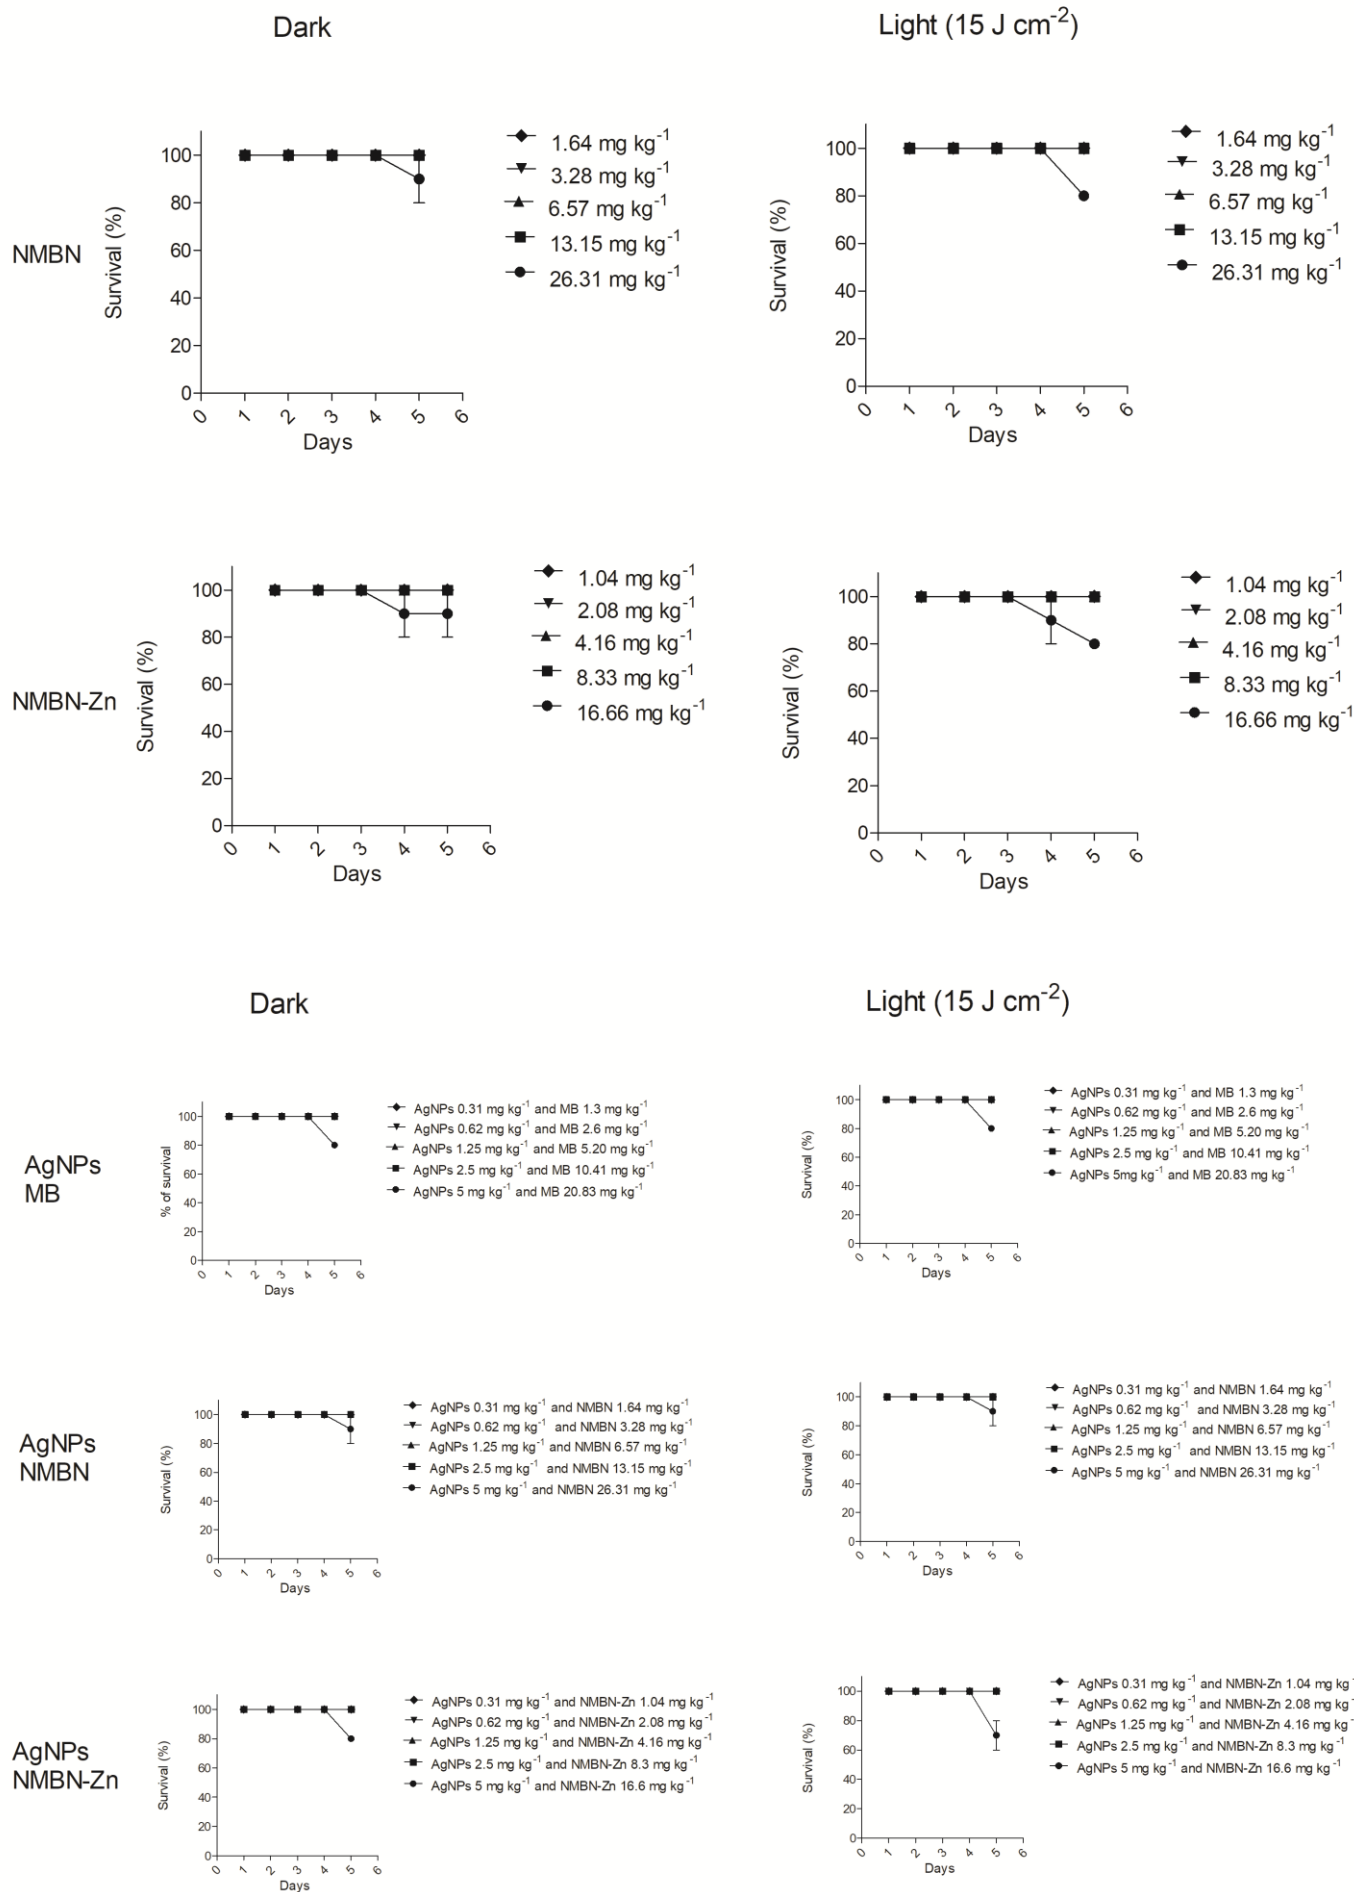

**Figure S1. Toxicity of APDT in *G. mellonella* larvae.** Larvae were inoculated with the compounds AgNO<sub>3</sub>, AgNPs, MB, NMBN, NMBN-Zn, and associations. Left, Survival of *G. mellonella* larvae over the days in the dark; Right, survival of *G. mellonella* larvae over the days after APDT 15 J cm<sup>-2</sup>. Control, naïve and PBS; AgNO<sub>3</sub>, silver nitrate; AgNPs, silver nanoparticles; MB, methylene blue; NMBN, new methylene blue N; NMBN-Zn, new methylene blue N Zinc; associations AgNPs-MB, AgNPs-NMBN, and AgNPs-NMBN-Zn.
